# Supplementary material for: Tri-armed Schiff base fluorescent sensor for the rapid recognition of Zn(ii): application in live cell imaging, test strips and TLC
Source: Royal Society of Chemistry journal article supplement (doi:10.1039/d4ay00774c), 2024-01-01
Supplement: d4ay00774c1.pdf [file d4ay00774c1.pdf]

## Electronic Supporting Information

### Tri-armed Schiff Base Fluorescent Sensor for Rapid Recognition of Zn(II): Application for Live Cell Images, Test strips and TLC

Chethanakumar<sup>a</sup>, Mahantesh B. Budri<sup>a</sup>, Kalagouda B. Gudasi<sup>a\*</sup>, Ramesh S. Vadavi<sup>a\*</sup>, Mallikarjun K. Patil<sup>b</sup>, Vijay M. Kumbar<sup>c</sup>, Sanjeev R. Inamdar<sup>b</sup>

<sup>a</sup> Department of Chemistry, Karnatak University, Dharwad 580003, India

<sup>b</sup> Laser Spectroscopy (DRDO/KU) Programme, Department of Physics, Karnatak University, Dharwad, 580003, India

<sup>c</sup> Dr. Prabhakar Kore Basic Science Research Centre, KLE Academy of Higher Education and Research (KLE University), Belagavi, 590010, India

\*Corresponding authors e-mail id: [drkbgudasi@kud.ac.in](mailto:drkbgudasi@kud.ac.in) (kbgudasi); [rsvadavi@gmail.com](mailto:rsvadavi@gmail.com)

(rsvadavi)

| Sl. No. | Contents                                            | Figure  |
|---------|-----------------------------------------------------|---------|
| 01      | <sup>1</sup> H-NMR and <sup>13</sup> C-NMR of THDBP | S1 & S2 |
| 02      | ESI-MS Spectrum of THDBP                            | S3      |
| 03      | ESI-MS Spectrum of Zn(II)-THDBP                     | S4      |
| 04      | FT-IR Spectra of THDBP                              | S5      |
| 05      | FT-IR Spectra of Zn(II)-THDBP                       | S6      |
| 06      | <sup>1</sup> H-NMR titration of THDBP with Zn(II)   | S7      |
| 07      | Job's plot                                          | S8      |
| 08      | Study of pH                                         | S9      |
| 09      | Reversibility study of THDBP                        | S10     |
| 10      | MTT assay                                           | S11     |
| 11      | SEM images                                          | S12     |

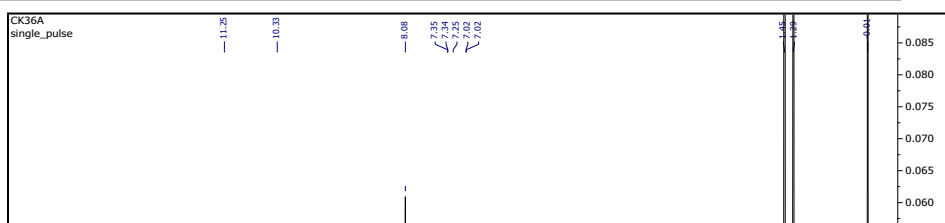

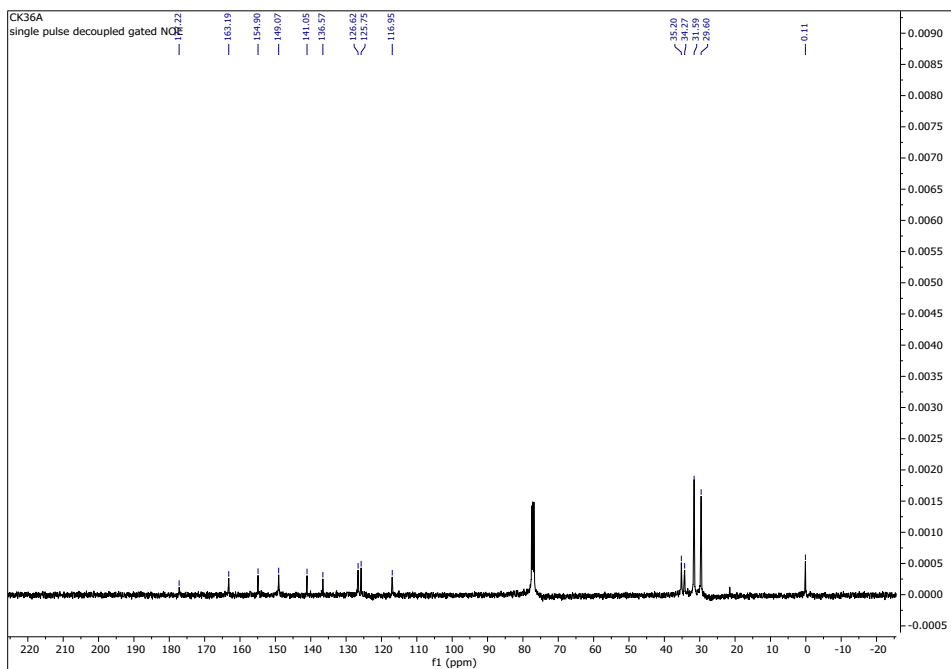

Fig. S2  $^{13}\text{C}$ - NMR spectrum of THDBP.

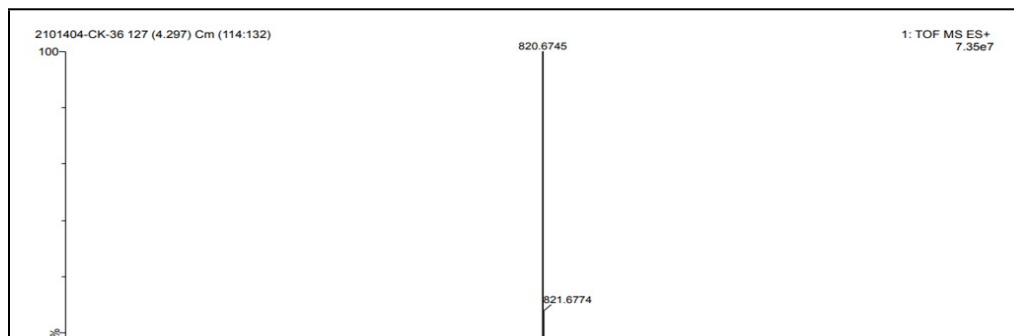

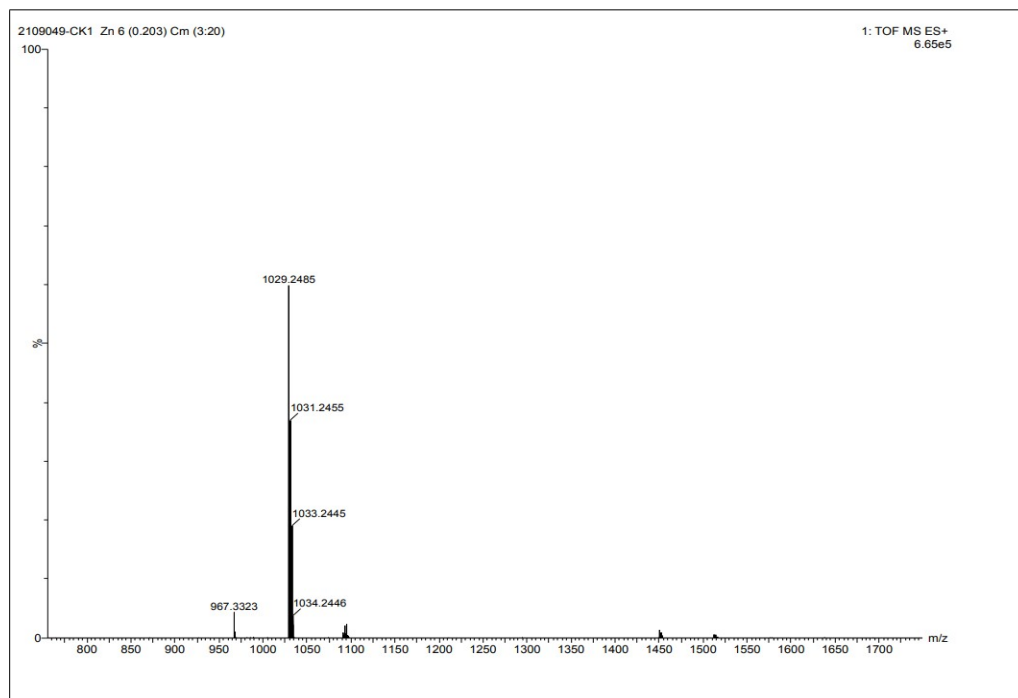

**Fig. S4** ESI-MS spectrum of Zn(II)-THDBP complex.

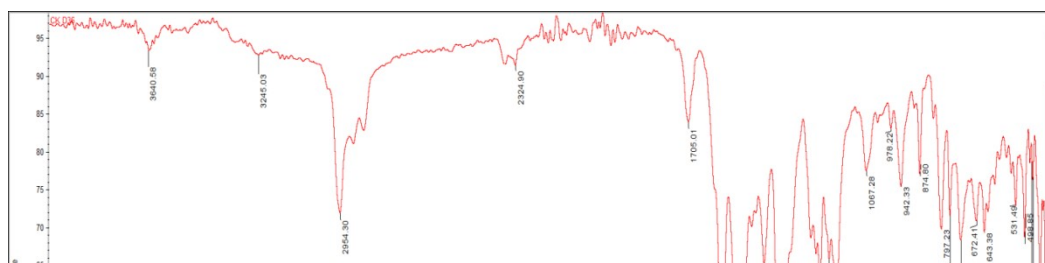

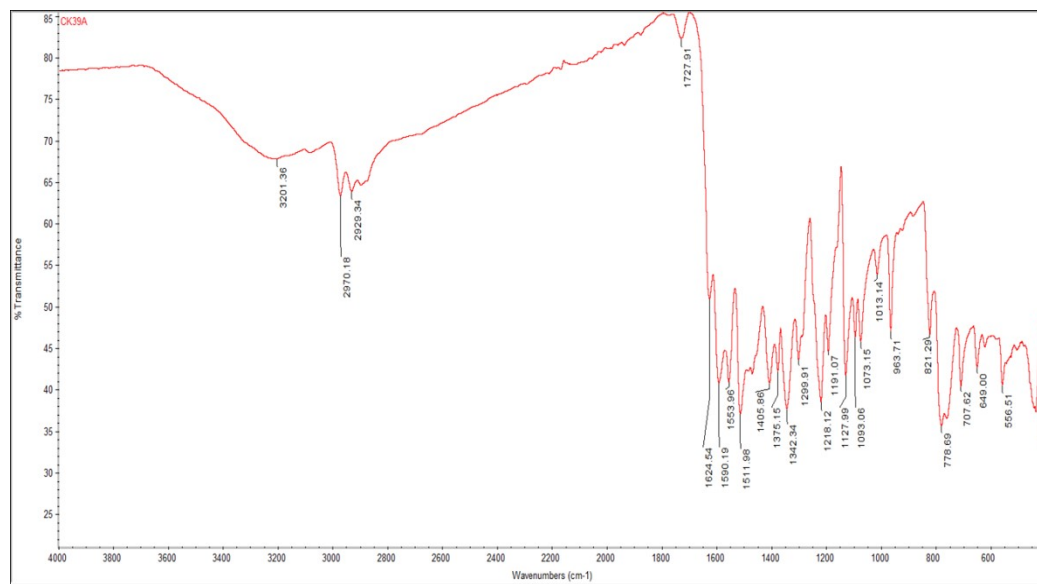

**Fig. S6** FT-IR Spectrum of Zn(II)-THDBP complex.

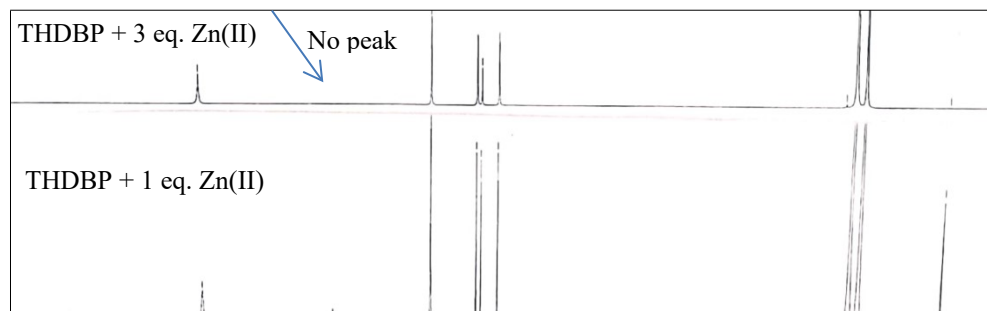

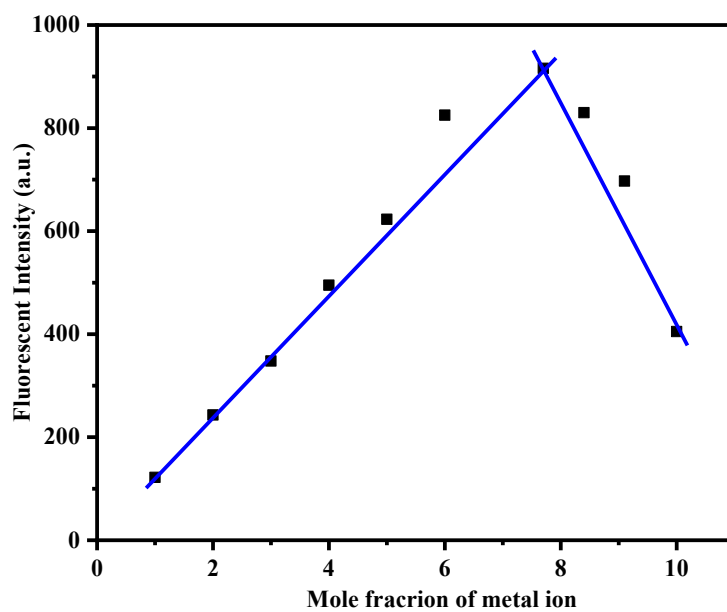

**Fig. S8** Job's plot demonstrating the 1:3 stoichiometry between THDBP and Zn(II). The mole ratio of  $[\text{Zn(II)}]/\{[\text{THDBP}] + [\text{Zn(II)}]\}$  was demonstrated.

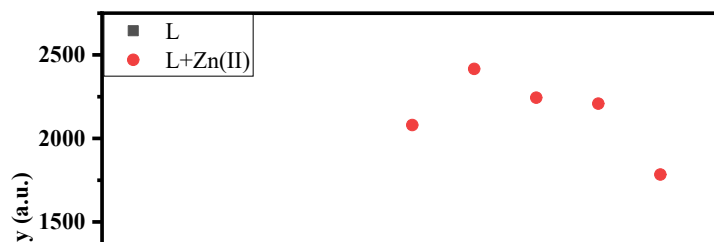

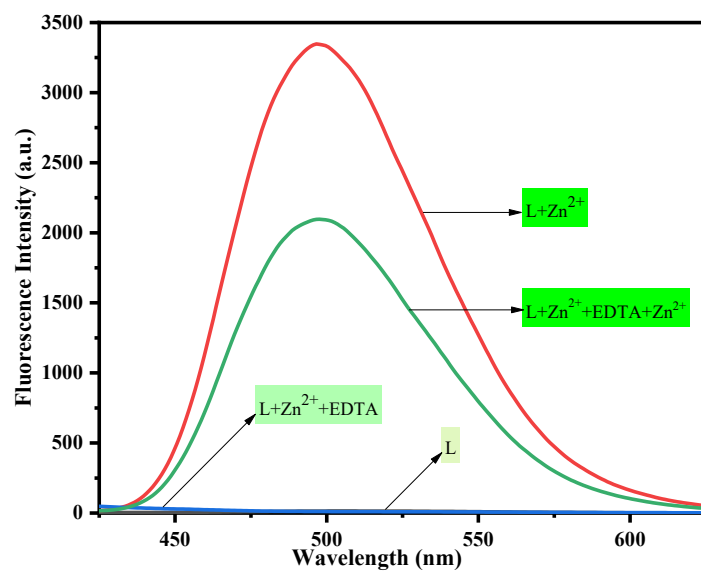

**Fig. S10** Reversible investigations of THDBP with EDTA in aq. acetonitrile.

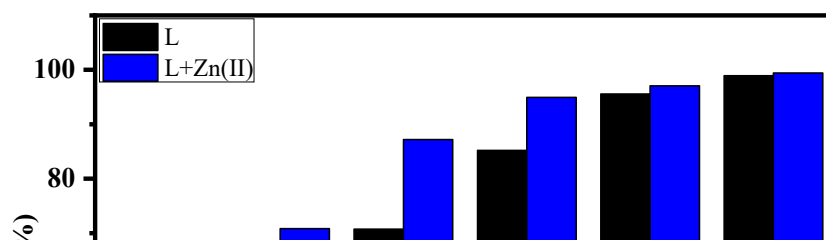

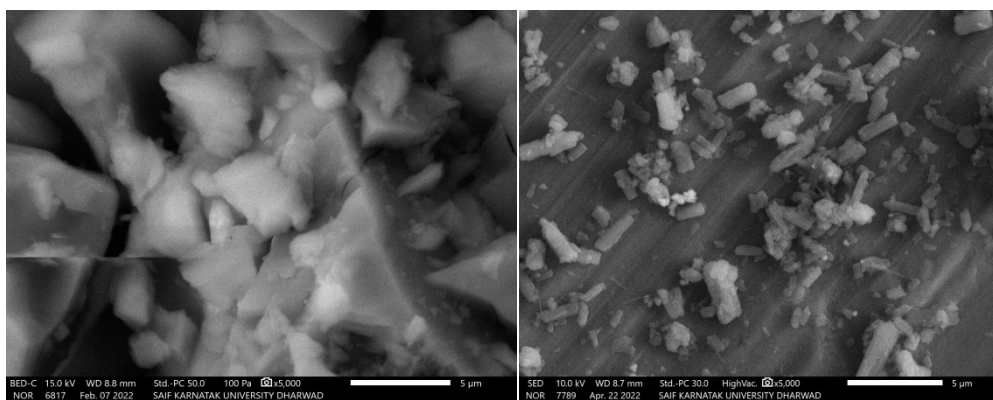

A)

B)

**Fig. S12** SEM images of surface morphology structures; (A) THDBP, (B) Zn(II)-THDBP.

**Table S1** The comparison of sensor THDBP with previously reported sensors for recognition of Zn(II).

| Sl. No. | Structure of the receptor                                                           | Detection Limit (M)   | Binding Constant (M <sup>-1</sup> ) | Application                                             | Reference |
|---------|-------------------------------------------------------------------------------------|-----------------------|-------------------------------------|---------------------------------------------------------|-----------|
| 01      | 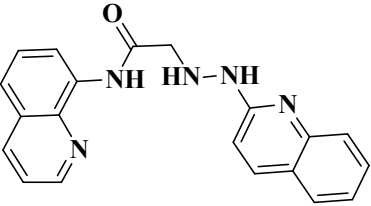   | $0.07 \times 10^{-6}$ | $1.14 \times 10^{10}$               | Test strips, bio-imaging and real water sample analysis | [33]      |
| 02      |   | $2.0 \times 10^{-7}$  | $7.0 \times 10^5$                   | -                                                       | [34]      |
| 03      |  | $0.53 \times 10^{-6}$ | $3.0 \times 10^3$                   | Test strips and real water sample analysis              | [35]      |
| 04      |  | $0.63 \times 10^{-7}$ | $1.13 \times 10^5$                  | Test strips and cell imaging                            | [36]      |
| 05      |  | $0.27 \times 10^{-6}$ | -                                   | Test strips, bio-imaging and real water sample analysis | [37]      |



|    |                                                                                     |                       |                    |                                     |      |
|----|-------------------------------------------------------------------------------------|-----------------------|--------------------|-------------------------------------|------|
| 06 | 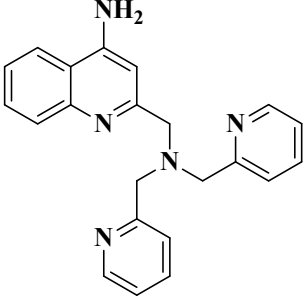   | $1.98 \times 10^{-7}$ | $7.41 \times 10^5$ | -                                   | [38] |
| 07 |    | $2.06 \times 10^{-6}$ | $1.0 \times 10^5$  | -                                   | [39] |
| 08 |    | $2.4 \times 10^{-6}$  | $1.0 \times 10^6$  | -                                   | [40] |
| 09 |  | $9.76 \times 10^{-6}$ | $1.85 \times 10^4$ | Cell imaging                        | [41] |
| 10 |  | $4.48 \times 10^{-6}$ | $1.4 \times 10^4$  | Real sample analysis                | [42] |
| 11 |  | $5.81 \times 10^{-6}$ | $1.69 \times 10^4$ | Logic gate and real sample analysis | [43] |
| 12 |  | $15.0 \times 10^{-6}$ | $1.53 \times 10^4$ | Real sample analysis                | [44] |

|    |                                                                                     |                       |                    |                      |      |
|----|-------------------------------------------------------------------------------------|-----------------------|--------------------|----------------------|------|
| 13 | 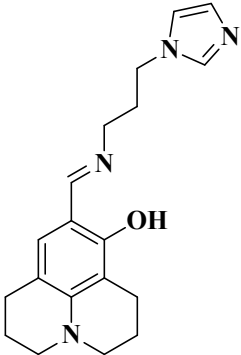   | $15.6 \times 10^{-6}$ | -                  | -                    | [45] |
| 14 |    | $10.0 \times 10^{-6}$ | $6.8 \times 10^4$  | -                    | [46] |
| 15 |   | $3.29 \times 10^{-7}$ | $1.25 \times 10^5$ | -                    | [47] |
| 16 |  | $2.0 \times 10^{-8}$  | $8.69 \times 10^5$ | Logic gate           | [48] |
| 17 |  | $6.64 \times 10^{-7}$ | $1.53 \times 10^3$ | Real sample analysis | [49] |

|    |                                                                                    |                        |                    |                              |              |
|----|------------------------------------------------------------------------------------|------------------------|--------------------|------------------------------|--------------|
| 18 | 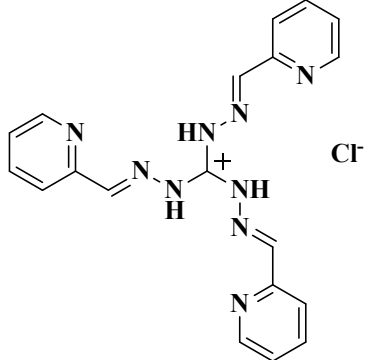  | $2.5 \times 10^{-6}$   | $6.1 \times 10^3$  | Cell imaging                 | [50]         |
| 19 |  | $1.03 \times 10^{-10}$ | $2.33 \times 10^8$ | Test strips and cell imaging | Present work |
